# Supplementary material for: Global Public Attitudes About Clinical Research and Patient Experiences With Clinical Trials
Source: PubMed Central journal article supplement (PMC6324429; doi:10.1001/jamanetworkopen.2018.2969), 2018-10-05
Supplement: jamanetwopen-1-e182969-s001.pdf [file jamanetwopen-1-e182969-s001.pdf]

## Supplementary Online Content

Anderson A, Borfitz D, Getz K. Global Public Attitudes About Clinical Research and Patient Experiences With Clinical Trials. *JAMA Netw Open*. 2018;1(6):e182969.

**eFigure 1.** Where Trial Participants First Learned About Study

**eFigure 2.** Services and Technologies Used in Clinical Trial

This supplementary material has been provided by the authors to give readers additional information about their work.

**eFigure 1**

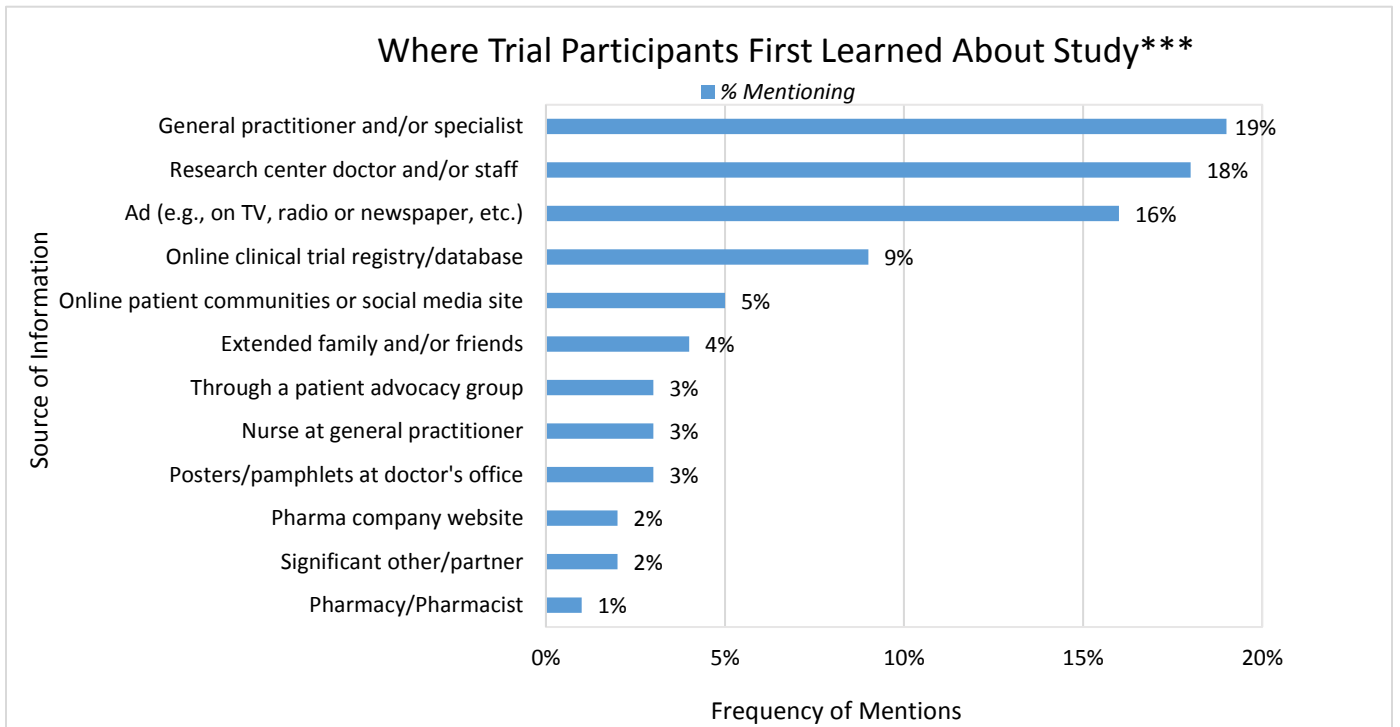

\*\*\*2017 Center for Information & Study on Clinical Research Participation Perceptions & Insights Study, Those who participated in a clinical trial (n=2,194)

**eFigure 2**

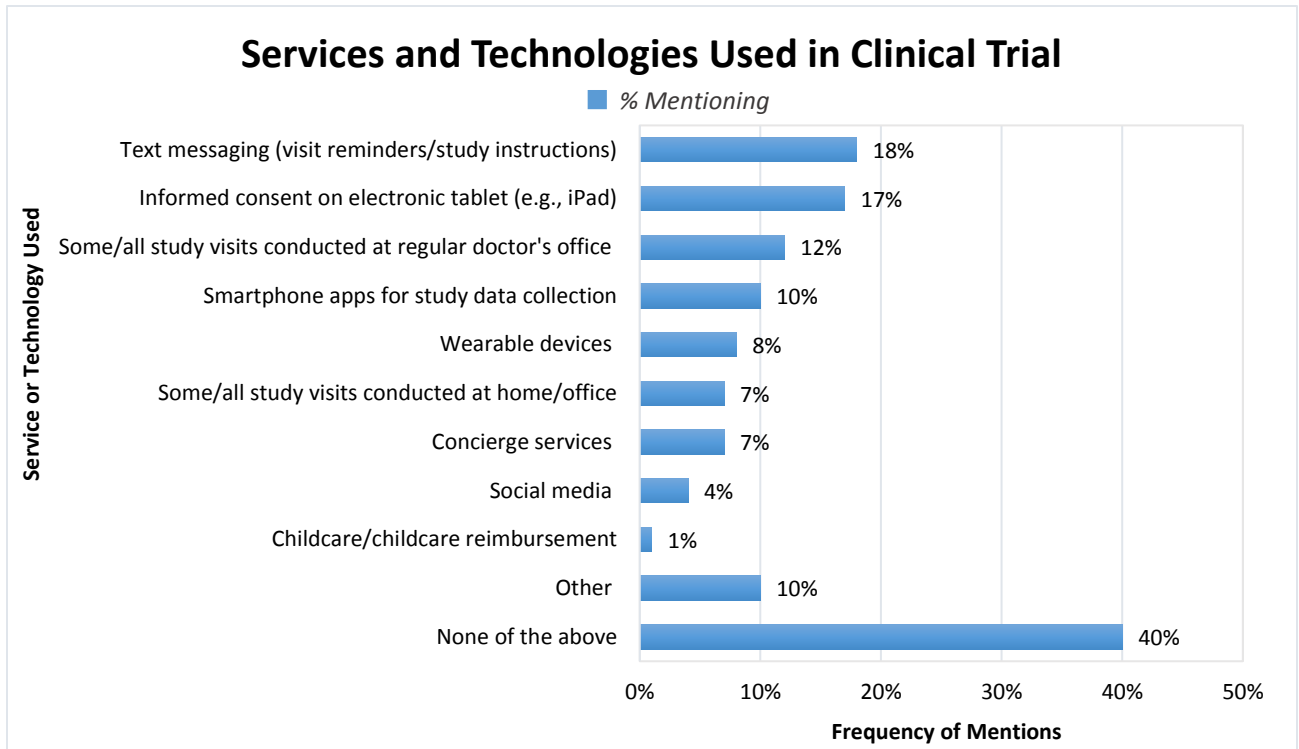

*\*\*\*2017 Center for Information & Study on Clinical Research Participation Perceptions & Insights Study, Those who participated in a clinical trial (n=2,194)*
